# Supplementary material for: Dmrt1 regulates the immune response by repressing the TLR4 signaling pathway in goat male germline stem cells
Source: PubMed Central journal article supplement — Zool Res. 2021 Jan 18;42(1):14–27. doi: 10.24272/j.issn.2095-8137.2020.186 (PMC7840460; doi:10.24272/j.issn.2095-8137.2020.186), 2021-01-18
Supplement: zr-42-1-14-S1.pdf [file zr-42-1-14-S1.pdf]

## Supplementary Tables and Figures

**Supplementary Table S1** Sequence of primers used in PCR amplification

| Gene name                      | GenBank accession No. | Primer Sequence (5'-3')                                         | Tm/°C | Size/bp |
|--------------------------------|-----------------------|-----------------------------------------------------------------|-------|---------|
| <i>Gapdh</i>                   | XM_005680968.3        | Fwd: CCACGCCATCACTGCCACCC<br>Rev: CAGCCTTGGCAGCGCCAGTA          | 58    | 116     |
| <i>Dmrt1</i>                   | XM_005683769.3        | Fwd: CCCGTGCCTGATGATTGA<br>Rev: GGCGATTCTCCGAGTTTT              | 58    | 380     |
| <i>TNF-<math>\alpha</math></i> | NM_013693.3           | Fwd: CCTGTAGCCCACGTCGTAG<br>Rev: GGGAGTAGACAAGGTACAACCC         | 58    | 148     |
| <i>IL-6</i>                    | NM_001314054.1        | Fwd: GAAACCGCTATGAAGTTCCTCTCTG<br>Rev: TGTTGGGAGTGGTATCCTCTGTGA | 58    | 136     |
| <i>IFN<math>\alpha</math></i>  | NM_010503.2           | Fwd: TACTCAGCAGACCTTGAACCT<br>Rev: CAGTCTTGGCAGCAAGTTGAC        | 58    | 307     |
| <i>IFN<math>\beta</math></i>   | NM_010510.1           | Fwd: GGATCCTCCACGCTGCGTTCC<br>Rev: CCGCCCTGTAGGTGAGGTTGA        | 58    | 153     |
| <i>Plzf</i>                    | JX047313.1            | Fwd: CACCGCAACAGCCAGCACTAT<br>Rev: CAGCGTACAGCAGGTCATCCAG       | 58    | 127     |
| <i>Csf1r</i>                   | XM_006525586.3        | Fwd: AACTATGTTGTCAAGGGCAATGC<br>Rev: GGACCACACATCACTCTGAACTG    | 58    | 99      |
| <i>Nanog</i>                   | FJ970651.1            | Fwd: GGAACCTGCTGGGGAAAATTA<br>Rev: TACAAATCTTCAGGCTGTATGTTG     | 58    | 118     |
| <i>Pcna</i>                    | NM_011045.2           | Fwd: AGTGGAGAACTTGAAATGGAA<br>Rev: GAGACAGTGGAGTGGCTTTTGT       | 58    | 167     |
| <i>IL-8</i>                    | NM_011339.2           | Fwd: TGATAGCAGTCCCAAAAATG<br>Rev: CCAACAGTAGCCTTCACCCAT         | 58    | 73      |
| <i>IL-10</i>                   | NM_010548.2           | Fwd: CTGGACAACATACTGCTAACCGA<br>Rev: CCTGGGGCATCACTTCTACC       | 58    | 112     |
| <i>TLR2</i>                    | XM_018060889.1        | Fwd: CGTGTTATCAGTTATGAGAAT<br>Rev: GAGCGTCACAGCGGTAG            | 58    | 203     |
| <i>TLR4</i>                    | NM_001285574.1        | Fwd: TAAAGAACTTGAGGAGGGCG<br>Rev: GGGACACCACGACAATCACC          | 58    | 138     |
| <i>TLR5</i>                    | NM_001285699.1        | Fwd: GGGACTCAGCCTCAGAGACAA<br>Rev: TGACCCAATGGATAAAAAGCACTA     | 58    | 197     |
| <i>TRAF3</i>                   | XM_013973268.2        | Fwd: GAGTCCCTCCAGAACCG<br>Rev: TCCGCCGCTTGTAGTCG                | 58    | 223     |

## Supplementary Table S2 H1 vs. shDmrt1 GO enrichment histogram

| Description                                                  | Term_type          | Corrected_pValue | DEG_item |
|--------------------------------------------------------------|--------------------|------------------|----------|
| oxidation-reduction process                                  | biological_process | 0                | 110      |
| proteolysis                                                  | biological_process | 0.000425         | 81       |
| cell adhesion                                                | biological_process | 0.000562         | 17       |
| transmembrane transport                                      | biological_process | 0.000738         | 78       |
| signal transduction                                          | biological_process | 0.00145          | 52       |
| metabolic process                                            | biological_process | 0.004103         | 58       |
| immune response                                              | biological_process | 0.014321         | 27       |
| oxidoreductase activity                                      | molecular_function | 0                | 60       |
| protein binding                                              | molecular_function | 0.000439         | 384      |
| catalytic activity                                           | molecular_function | 0.001278         | 46       |
| cysteine-type endopeptidase inhibitor activity               | molecular_function | 0.002236         | 11       |
| oxidoreductase activity, acting on the CH-CH group of donors | molecular_function | 0.032465         | 11       |
| viral envelope                                               | cellular_component | 0.001751         | 8        |
| myosin complex                                               | cellular_component | 0.018035         | 13       |
| extracellular matrix                                         | cellular_component | 0.032871         | 9        |

## Supplementary Table S3 H1 vs. shDmrt1 KEGG enriched pathways

| #Pathway                                   | KO      | Enrichment Factor | Q-value  | Gene Number |
|--------------------------------------------|---------|-------------------|----------|-------------|
| Fatty acid metabolism                      | ko01212 | 3.57              | 5.20E-08 | 27          |
| Valine, leucine and isoleucine degradation | ko00280 | 3.38              | 2.81E-07 | 27          |
| Cytokine-cytokine receptor interaction     | ko04060 | 1.89              | 3.49E-06 | 74          |
| Propanoate metabolism                      | ko00640 | 4.25              | 3.73E-06 | 17          |
| Fatty acid degradation                     | ko00071 | 3.31              | 4.06E-06 | 24          |
| Malaria                                    | ko05144 | 3.17              | 2.23E-05 | 23          |
| Rheumatoid arthritis                       | ko05323 | 2.51              | 6.22E-05 | 32          |
| Glycine, serine and threonine metabolism   | ko00260 | 3.29              | 7.14E-05 | 20          |
| Amoebiasis                                 | ko05146 | 2.2               | 9.59E-05 | 41          |
| PPAR signaling pathway                     | ko03320 | 2.47              | 0.000226 | 30          |
| Phagosome                                  | ko04145 | 1.92              | 0.000875 | 48          |
| Osteoclast differentiation                 | ko04380 | 2.05              | 0.001633 | 38          |
| ECM-receptor interaction                   | ko04512 | 2.25              | 0.002916 | 29          |
| Protein digestion and absorption           | ko04974 | 2.2               | 0.004783 | 29          |
| Tuberculosis                               | ko05152 | 1.81              | 0.004833 | 48          |
| Leishmaniasis                              | ko05140 | 2.38              | 0.005676 | 24          |
| Biosynthesis of unsaturated fatty acids    | ko01040 | 3.38              | 0.006636 | 13          |
| TNF signaling pathway                      | ko04668 | 2.04              | 0.007265 | 33          |
| Mineral absorption                         | ko04978 | 2.7               | 0.008961 | 18          |
| beta-Alanine metabolism                    | ko00410 | 2.95              | 0.021098 | 14          |

**Supplementary Table S4** H1 vs. shDmrt1 differentially expressed genes

| #ID                        | H1-9_Cou<br>nt | shDmrt1-9<br>Count | H1-9_FPK<br>M | shDmrt1-9_<br>FPKM | FDR      | log2FC   | regulat<br>ed |
|----------------------------|----------------|--------------------|---------------|--------------------|----------|----------|---------------|
| Dmrt1(ENSMUSG00000024837)  | 360            | 39                 | 8.348695      | 0.938961           | 6.88E-15 | -3.18009 | down          |
| Zbtb16(ENSMUSG0000006687)  | 452            | 54                 | 2.932735      | 0.350825           | 8.55E-15 | -3.05989 | down          |
| Kit(ENSMUSG00000005672)    | 1965           | 239                | 22.20534      | 2.820006           | 0        | -3.07551 | down          |
| Etv5(ENSMUSG00000013089)   | 1092           | 317                | 14.60727      | 4.274957           | 1.58E-06 | -1.82524 | down          |
| Gata4(ENSMUSG00000021944)  | 2478           | 444                | 41.45055      | 7.917682           | 1.69E-12 | -2.52272 | down          |
| Sox9(ENSMUSG00000000567)   | 956            | 299                | 12.80558      | 4.161969           | 9.56E-06 | -1.71747 | down          |
| Il1b(ENSMUSG00000027398)   | 64             | 1234               | 2.58645       | 50.2955            | 0        | 4.173474 | up            |
| Tnf(ENSMUSG00000024401)    | 280            | 2511               | 9.265935      | 82.96671           | 0        | 3.106113 | up            |
| Tlr4(ENSMUSG00000039005)   | 772            | 2064               | 6.374413      | 14.34809           | 0.001531 | 1.367774 | up            |
| Tlr2(ENSMUSG00000027995)   | 1552           | 8647               | 32.42067      | 186.2071           | 1.66E-11 | 2.427948 | up            |
| Tlr6(ENSMUSG00000051498)   | 354            | 1139               | 5.478673      | 17.37242           | 3.80E-05 | 1.631319 | up            |
| Nfkb2(ENSMUSG00000025225)  | 1408           | 3705               | 23.66947      | 65.2301            | 0.002421 | 1.346008 | up            |
| Tlr13(ENSMUSG00000033777)  | 943            | 2415               | 12.0945       | 30.3329            | 0.003568 | 1.306223 | up            |
| Cxcl10(ENSMUSG00000034855) | 515            | 1290               | 33.12505      | 82.51052           | 0.004899 | 1.272612 | up            |

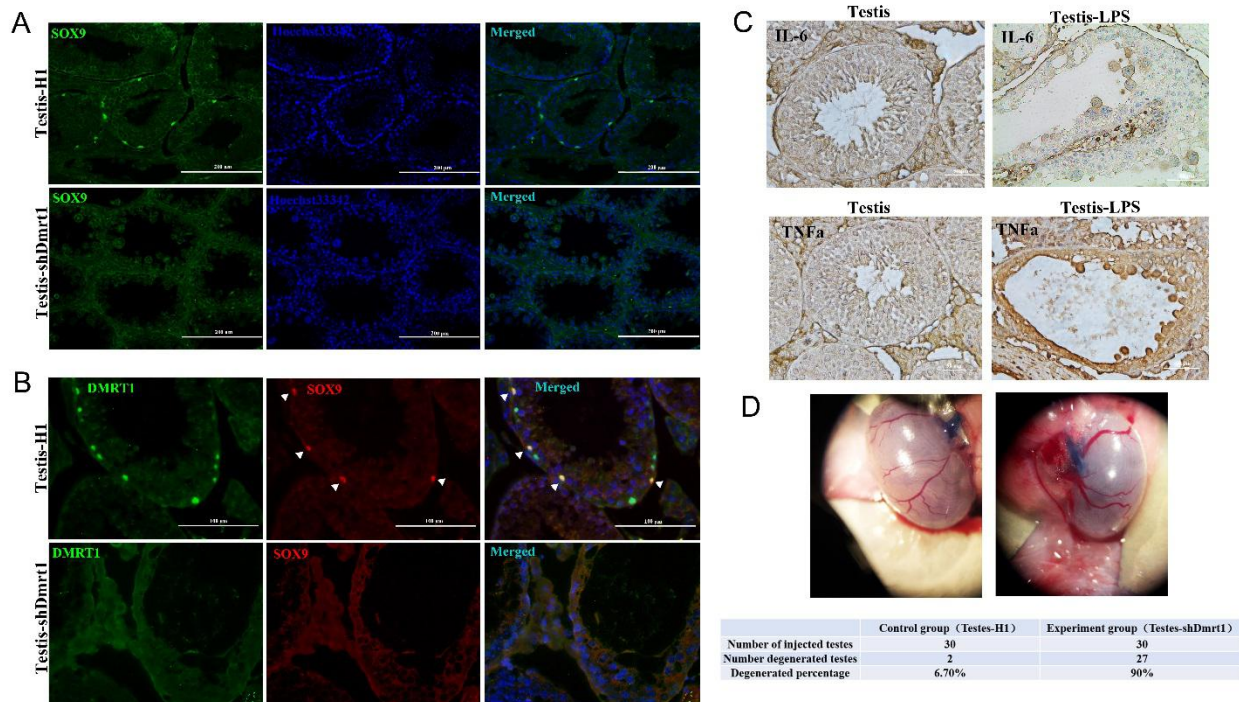

**Supplementary Figure S1. Knockdown of Dmrt1 in seminiferous tubules resulted in widespread degeneration of Sertoli cells.** A: Immunofluorescence staining of Sox9 in pSIH-H1-shDmrt1 or pSIH-H1 lentivirus-injected testes. Scale bar: 200  $\mu$ m. B: Immunofluorescence staining of Dmrt1 and Sox9 in pSIH-H1-shDmrt1 or pSIH-H1 lentivirus-injected testes. Scale bar: 100  $\mu$ m. C: Immunohistochemical detection of IL-6 and TNF $\alpha$  in normal testes and LPS-injected testes. Scale bar: 50  $\mu$ m. D: shDmrt1 and H1 lentivirus were injected into seminiferous tubules of mouse testes harmlessly.

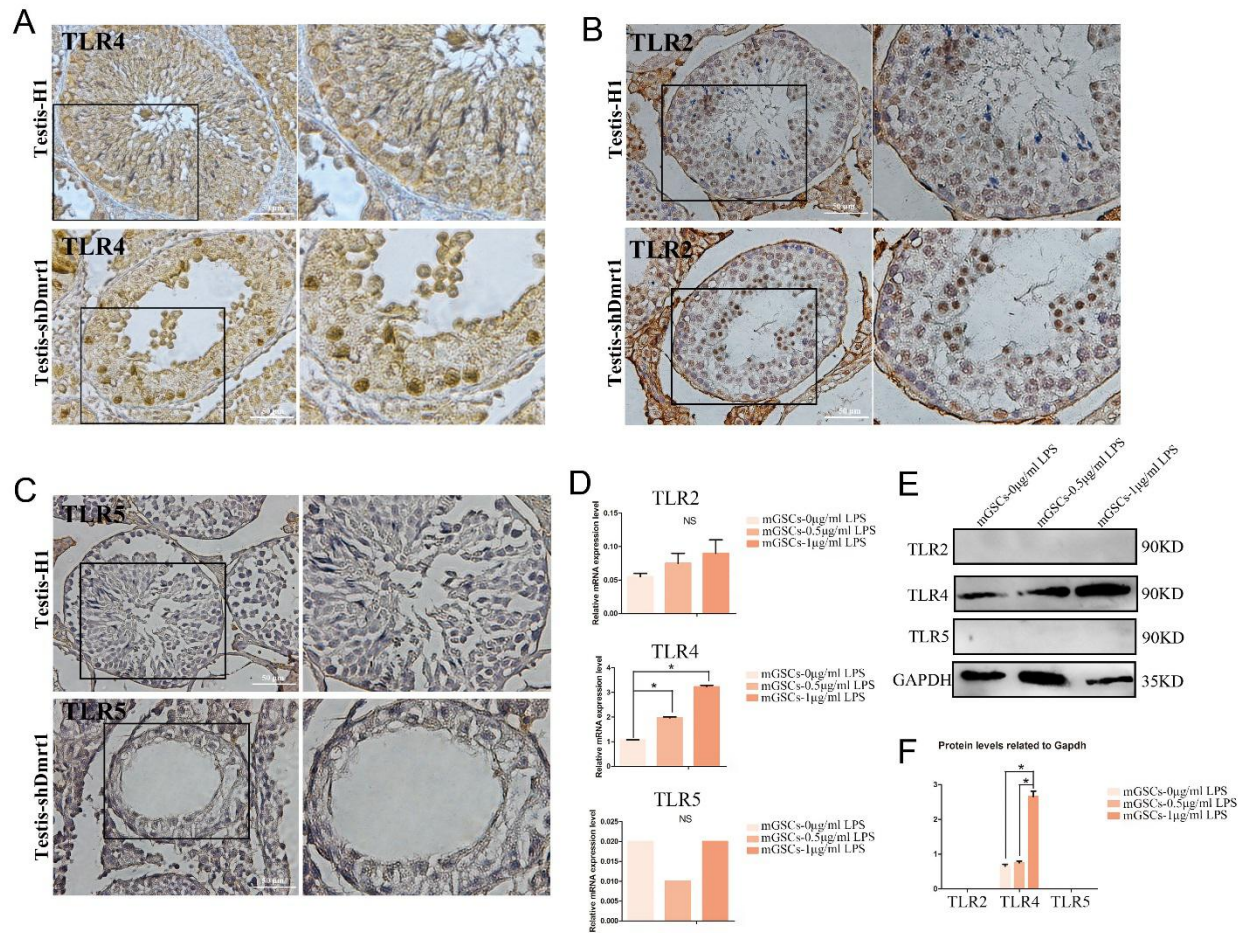

**Supplementary Figure S2. TLR4 was mainly expressed in mGSCs and resulted in immune response.** A: TLR4 was mainly located in spermatogonial stem cells. Knockdown of Dmrt1 expression in testicular cells led to up-regulation of TLR4. Scale bar: 50  $\mu$ m. B TLR2 was mainly located in spermatocytes. Knockdown of Dmrt1 expression in testicular cells led to up-regulation of TLR2. Scale bar: 50  $\mu$ m. C: Immunohistochemical staining of TLR5. Scale bar: 50  $\mu$ m. D: mRNA expression levels of TLRs after mGSCs were treated with different concentrations of LPS. E: Protein expression levels of TLRs after mGSCs were treated with different concentrations of LPS. F: Protein levels were quantified using ImageJ software and normalized to GAPDH. For all statistical analyses, \* $P < 0.05$ , \*\* $P < 0.01$ , \*\*\* $P < 0.001$ .

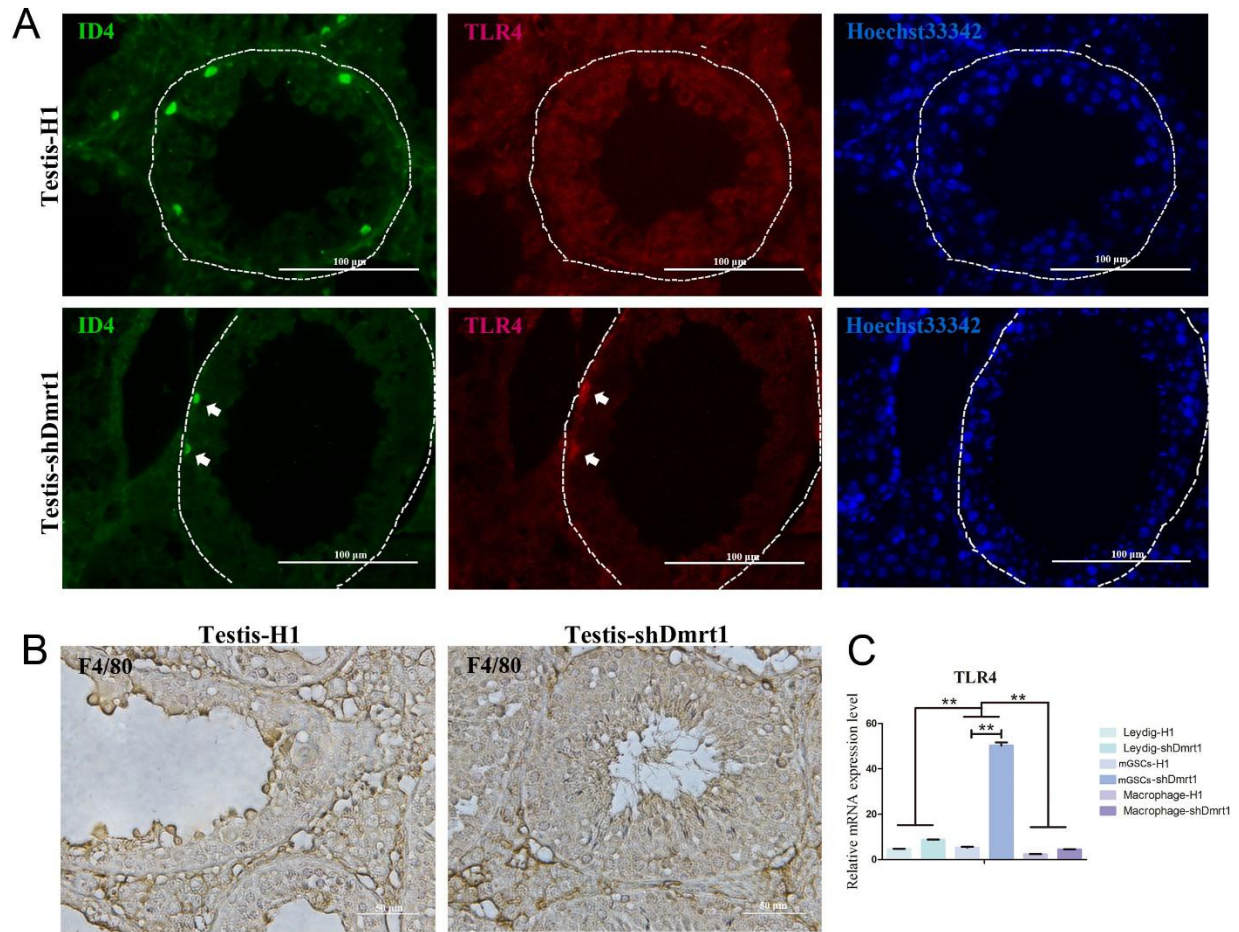

**Supplementary Figure S3. TLR4 located in mGSCs was mainly responsible for immune response in seminiferous tubules.** A: Co-immunofluorescence staining of ID4 and TLR4 in Testis-H1 and Testis-shDmrt1. Scale bar: 100  $\mu$ m. B: Immunohistochemical staining of F4/80 in Testis-H1 and Testis-shDmrt1. Scale bar: 50  $\mu$ m. C: mRNA expression level of TLR4 in Leydig cells, macrophages, and mGSCs in Dmrt1-knockdown testes, respectively. For all statistical analyses, \* $P < 0.05$ , \*\* $P < 0.01$ , \*\*\* $P < 0.001$

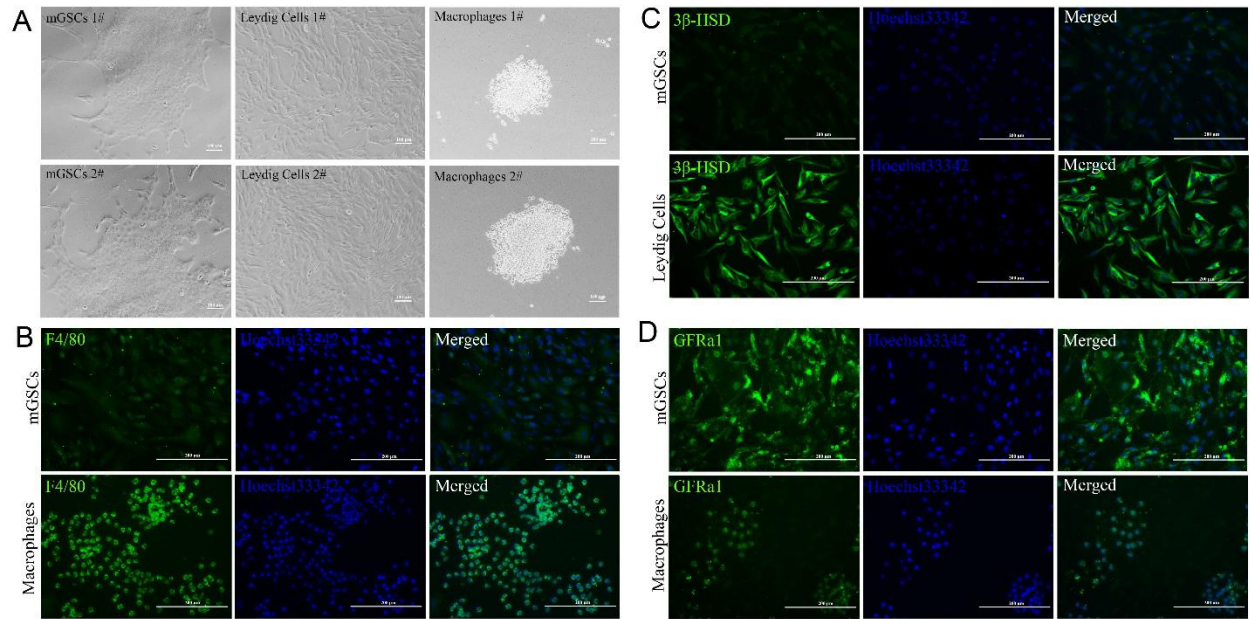

**Supplementary Figure S4. Isolation and identification of mGSCs, Leydig cells, and macrophages.** A: Characteristics of mGSCs, Leydig cells, and macrophages. Scale bar: 100  $\mu$ m. B: Immunofluorescence staining of F4/80 in mGSCs and macrophages. Scale bar: 200  $\mu$ m. C: Immunofluorescence staining of 3 $\beta$ -HSD in mGSCs and Leydig cells. Scale bar: 200  $\mu$ m. D: Immunofluorescence staining of GFR $\alpha$ 1 in mGSCs and macrophages. Scale bar: 200  $\mu$ m.

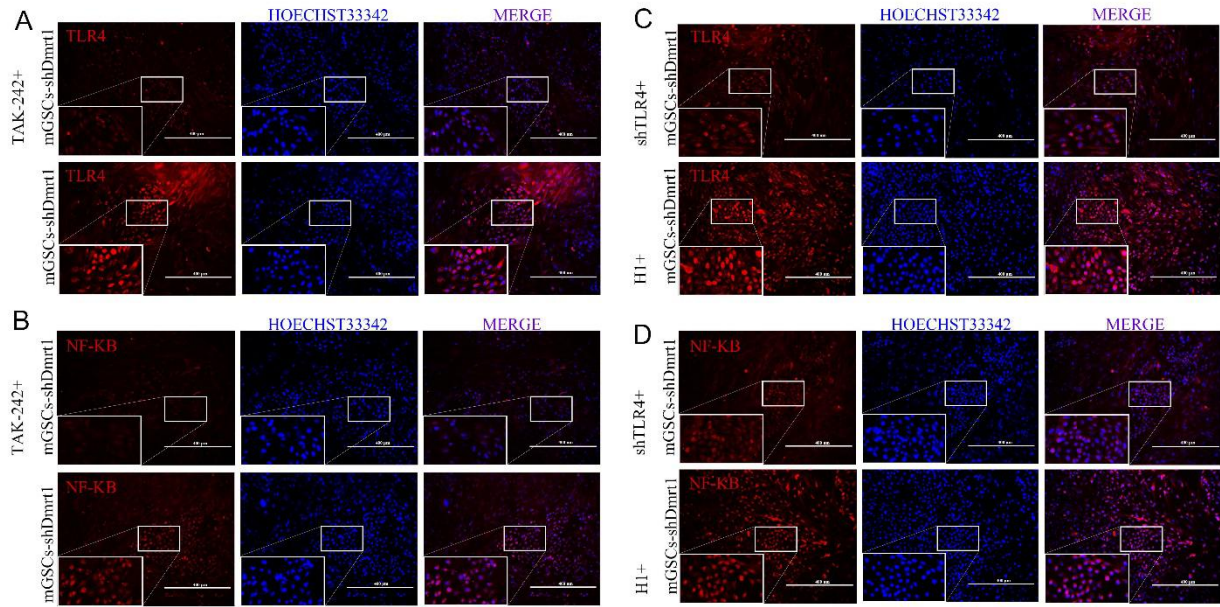

**Supplementary Figure S5. Dmrt1 inhibited TLR4 signaling pathways in mGSCs.** A: Immunofluorescence detection of TLR4 in TAK-242-treated mGSCs-shDmrt1 and mGSCs-shDmrt1. Scale bar: 400  $\mu$ m. B: Immunofluorescence detection of NF- $\kappa$ B in TAK-242-treated mGSCs-shDmrt1 and mGSCs-shDmrt1. Scale bar: 400  $\mu$ m. C: Immunofluorescence detection of TLR4 in shTLR4 lentivirus-treated mGSCs-shDmrt1 and H1 lentivirus-treated mGSCs-shDmrt1. Scale bar: 400  $\mu$ m. D: Immunofluorescence detection of NF- $\kappa$ B in shTLR4 lentivirus-treated mGSCs-shDmrt1 and H1 lentivirus-treated mGSCs-shDmrt1. Scale bar: 400  $\mu$ m.



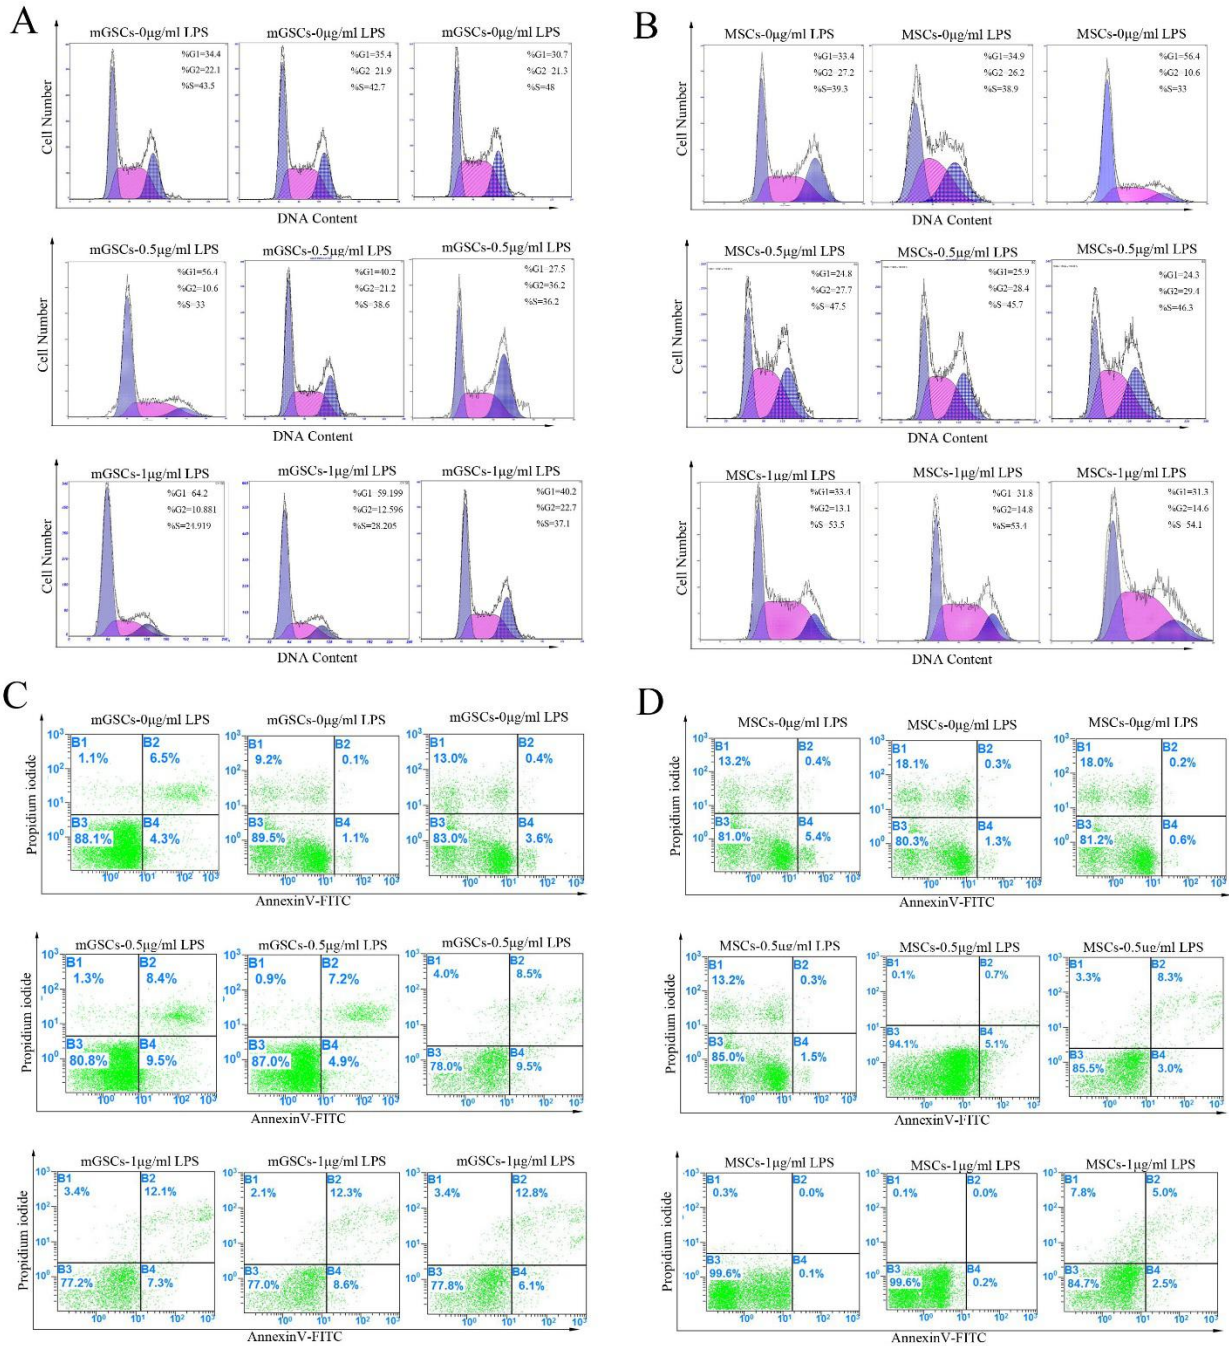

**Supplementary Figure S6. Flow cytometry data of cell cycle and apoptosis. A:** Flow cytometry of cell cycle in mGSCs under LPS treatment (0, 0.5, and 1 µg/ml), respectively. **B:** Flow cytometry of cell cycle in MSCs under LPS treatment (0, 0.5, and 1 µg/ml), respectively. **C:** Flow cytometry of apoptosis in mGSCs under LPS treatment (0, 0.5, and 1 µg/ml), respectively. **D:**

Flow cytometry of apoptosis in MSCs under LPS treatment (0, 0.5, and 1  $\mu\text{g}/\text{mL}$ ), respectively.

For each test, three biological replicates were conducted.

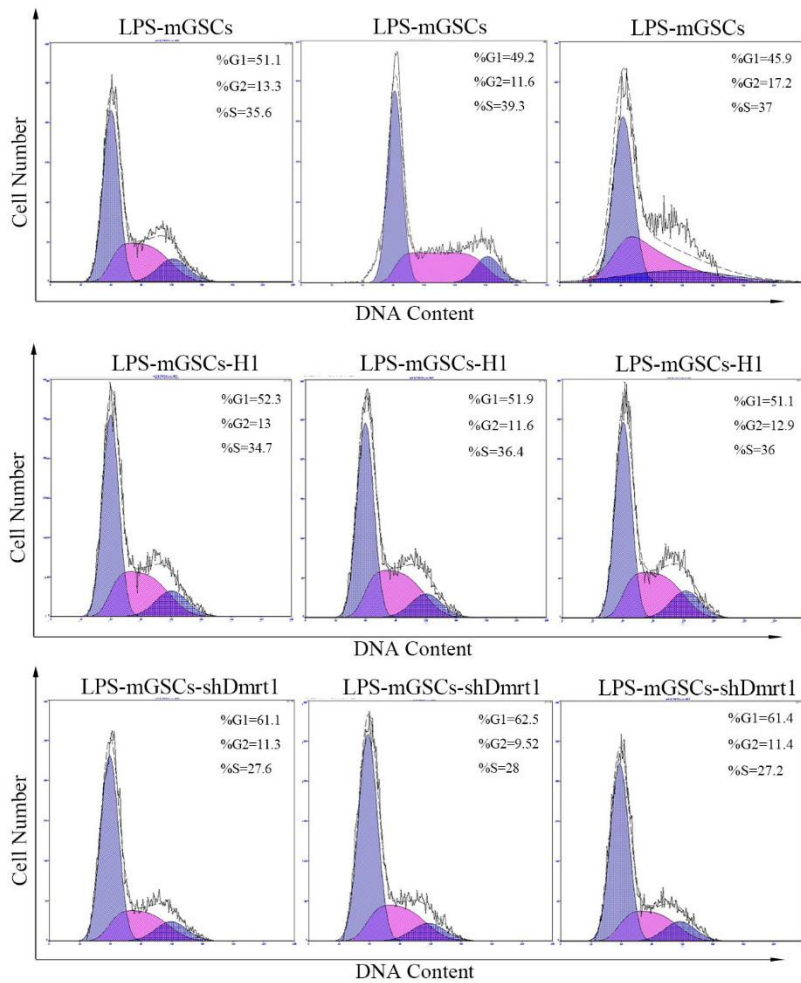

**Supplementary Figure S7. Flow cytometry data of cell cycle in LPS-mGSCs.** Flow cytometry

data of cell cycle in LPS-mGSCs, LPS-mGSCs-H1, and LPS-mGSCs-shDmrt1, respectively. For each

test, three biological replicates were conducted.
